# Supplementary material for: Proton conduction in AIII0.5BV0.5P2O7 compounds at intermediate temperatures
Source: Royal Society of Chemistry journal article supplement (doi:10.1039/c2jm31887c), 2012-01-01

## Supplementary Information

### Proton conduction in $A^{III}_{0.5}B^V_{0.5}P_2O_7$ at intermediate temperatures

Yanbai Shen,<sup>a</sup> Keijiro Kojima,<sup>a</sup> Masakazu Nishida,<sup>b</sup> Pilwon Heo,<sup>c</sup> Kyoung Hwan Choi,<sup>c</sup> Hyuk Chang,<sup>c</sup> and Takashi Hibino<sup>\*a</sup>

<sup>a</sup>Graduate School of Environmental Studies, Nagoya University, Nagoya 464-8601, Japan

<sup>b</sup>Research Institute Instrumentation Frontier, National Institute of Advanced Industrial Science and Technology, Moriyama-ku, Nagoya 463-8560, Japan

<sup>c</sup>Energy Lab, Samsung Advanced Institute of Technology, Gyeonggi-do 446-712, South Korea

| Table of contents                                                                          | Page |
|--------------------------------------------------------------------------------------------|------|
| <b>Table S1:</b> Crystalline phases of compounds comprised of the other $A^{III}$ elements | S2   |
| <b>Figure S1(a):</b> XRD pattern of $Fe_{0.5-x}Nb_{0.5}P_2O_7$                             | S3   |
| <b>Figure S1(b):</b> XRD pattern of $Fe_{0.5}Nb_{0.5-x}P_2O_7$                             | S4   |
| <b>Figure S1(c):</b> XRD pattern of $Fe_{0.5-x}Ta_{0.5}P_2O_7$                             | S5   |
| <b>Figure S1(d):</b> XRD pattern of $Fe_{0.5}Ta_{0.5-x}P_2O_7$                             | S6   |
| <b>Figure S2:</b> $^{31}P$ MAS NMR spectrum of $Fe_{0.35}Nb_{0.5}P_2O_7$                   | S7   |
| <b>Figure S3(a):</b> Electrical conductivity of $In_{0.5}Sb_{0.5-x}P_2O_7$                 | S8   |
| <b>Figure S3(b):</b> Electrical conductivity of $Fe_{0.5}Nb_{0.5-x}P_2O_7$                 | S9   |
| <b>Figure S3(c):</b> Electrical conductivity of $Fe_{0.5}Ta_{0.5-x}P_2O_7$                 | S10  |

Table S1. Crystalline phases of compounds comprised of the other A elements

| A  | B  | Crystalline phase                                                                               |
|----|----|-------------------------------------------------------------------------------------------------|
| Al | Sb | unindexed                                                                                       |
| Ga | Sb | unindexed                                                                                       |
| Y  | Sb | $\text{Sb}_2(\text{P}_2\text{O}_7)_2$                                                           |
| Bi | Sb | $\text{BiPO}_4, \text{Sb}_2(\text{P}_2\text{O}_7)_2$                                            |
| La | Nb | $\text{La}_7\text{P}_3\text{O}_{18}, \text{Nb}_2\text{O}_5, \text{Nb}_5\text{P}_7\text{O}_{30}$ |
| Nd | Nb | $\text{Nd}_5\text{P}_5\text{O}_{14}, \text{Nb}_2\text{O}_5, \text{Nb}_5\text{P}_7\text{O}_{30}$ |
| Sm | Nb | $\text{Sm}_5\text{P}_9\text{O}_{30}, \text{Nb}_2\text{O}_5, \text{Nb}_5\text{P}_7\text{O}_{30}$ |
| In | Ta | $\text{In}_2\text{O}_3, \text{In}(\text{PO}_3)_3, \text{Ta}_2\text{PO}_5$                       |
| Sb | Ta | $\text{Ta}_2\text{PO}_5$                                                                        |
| La | Ta | $\text{LaP}_5\text{O}_{14}, \text{Ta}_2\text{PO}_5$                                             |

Figure S1(a): XRD pattern of  $\text{Fe}_{0.5-x}\text{Nb}_{0.5}\text{P}_2\text{O}_7$

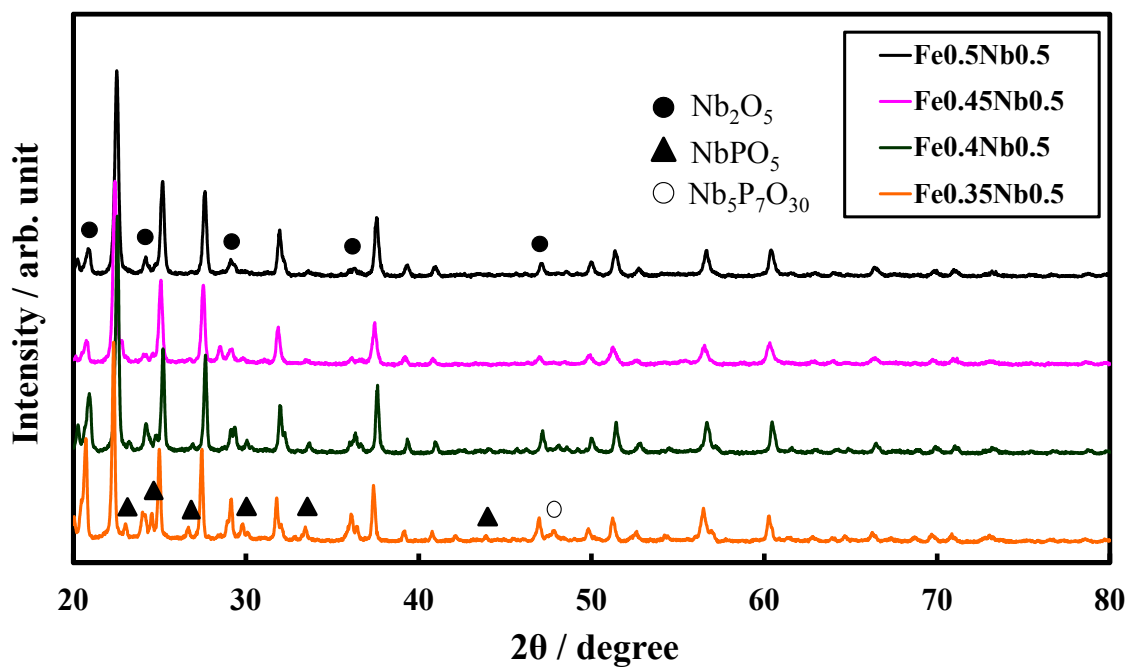

Figure S1(b): XRD pattern of  $\text{Fe}_{0.5}\text{Nb}_{0.5-x}\text{P}_2\text{O}_7$

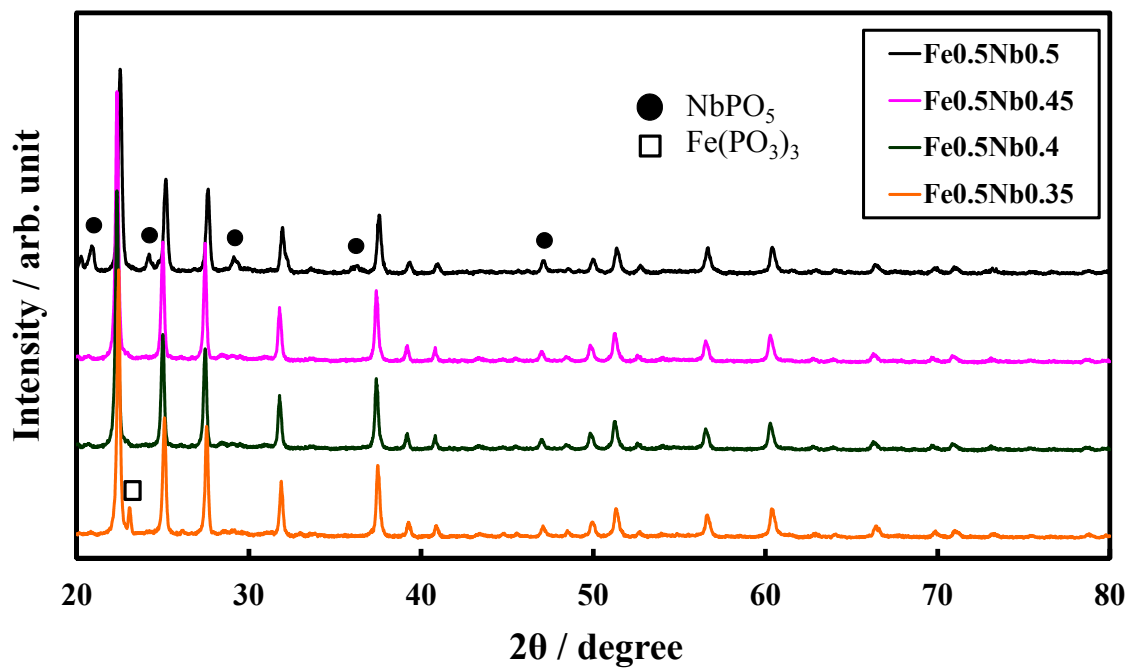

Figure S1(c): XRD pattern of  $\text{Fe}_{0.5-x}\text{Ta}_{0.5}\text{P}_2\text{O}_7$

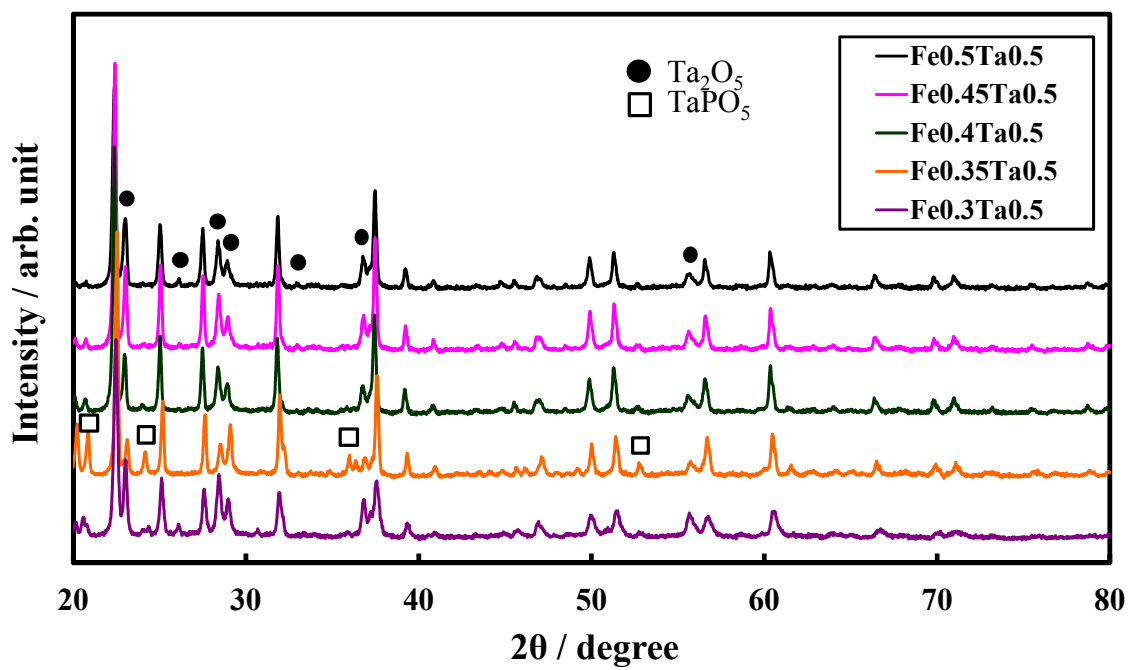

Figure S1(d): XRD pattern of  $\text{Fe}_{0.5}\text{Ta}_{0.5-x}\text{P}_2\text{O}_7$

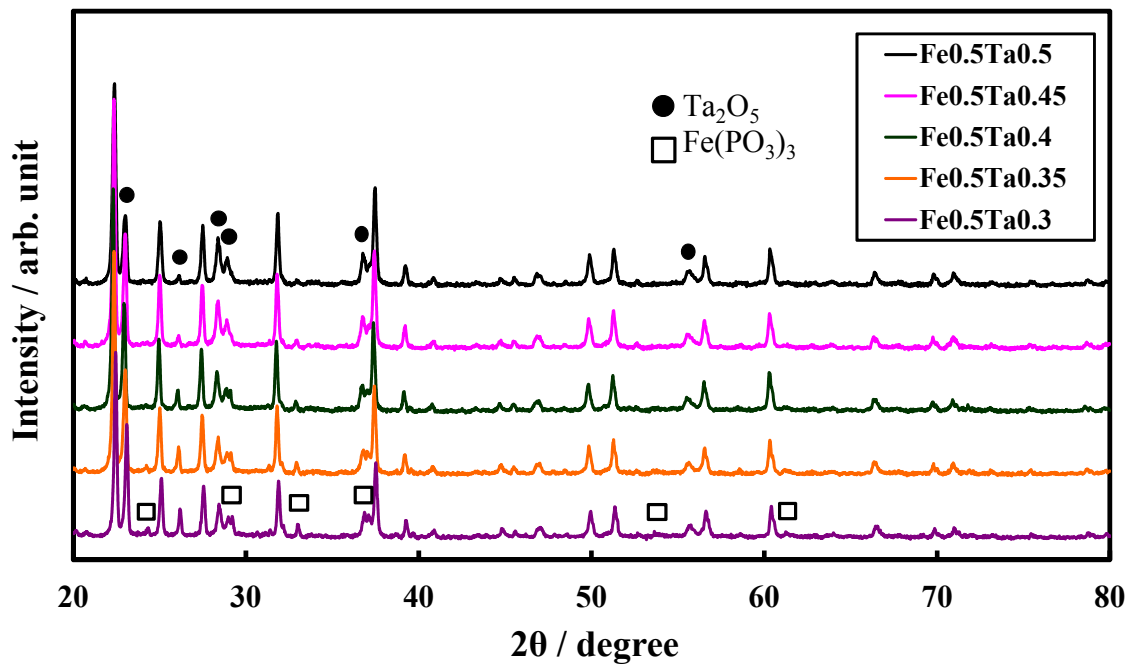

**Figure S2:**  $^{31}\text{P}$  MAS NMR spectrum of  $\text{Fe}_{0.35}\text{Nb}_{0.5}\text{P}_2\text{O}_7$

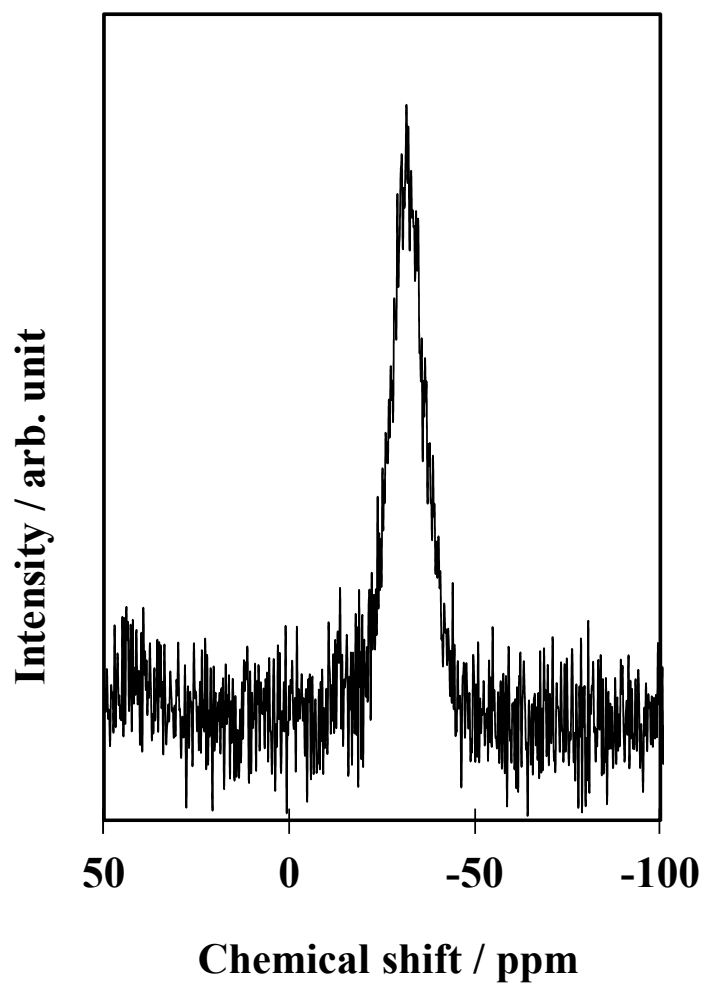

Figure S3(a): Electrical conductivity of  $\text{In}_{0.5}\text{Sb}_{0.5-x}\text{P}_2\text{O}_7$

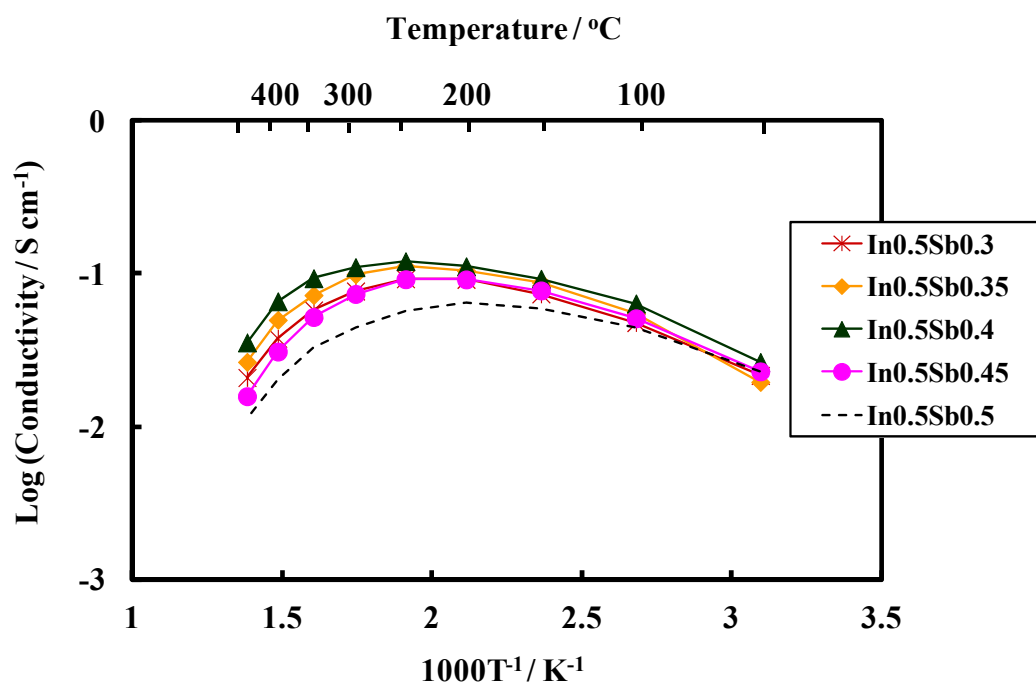



Figure S3(b): Electrical conductivity of  $\text{Fe}_{0.5}\text{Nb}_{0.5-x}\text{P}_2\text{O}_7$

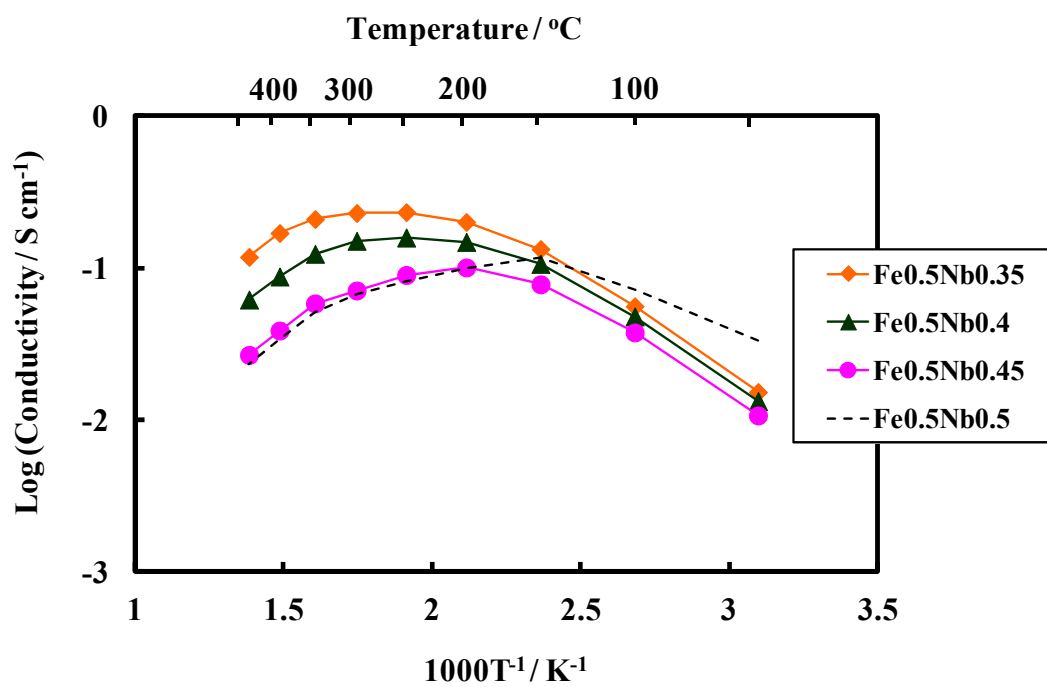

Figure S3(c): Electrical conductivity of  $\text{Fe}_{0.5}\text{Ta}_{0.5-x}\text{P}_2\text{O}_7$

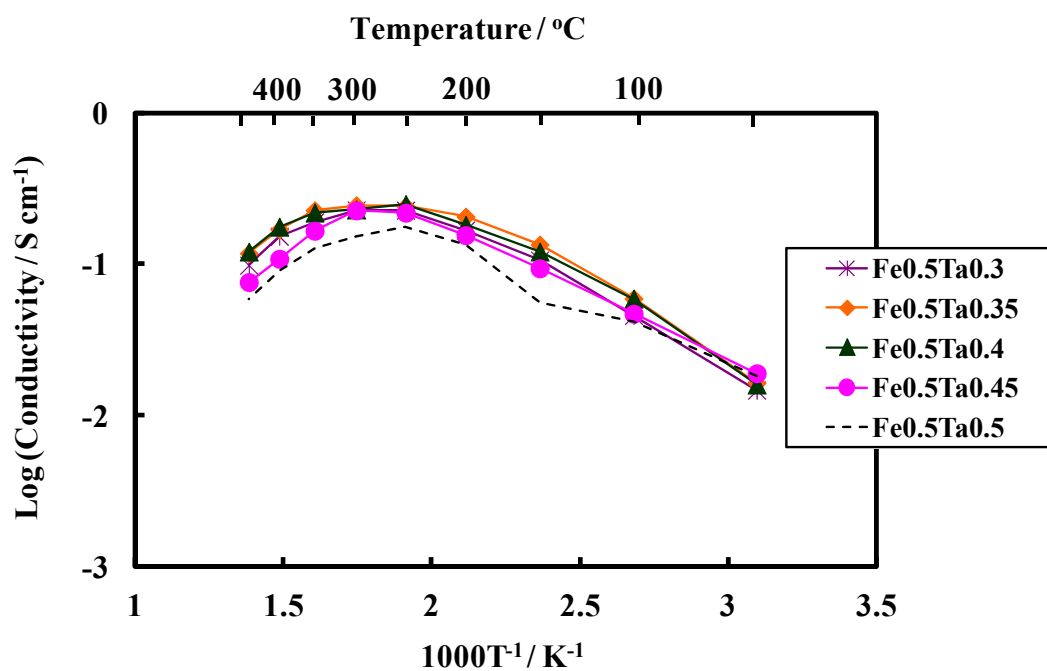

Supplement: c2jm31887c.pdf [file c2jm31887c.pdf]
